# Supplementary material for: Integrated Bioinformatics Analysis and Verification of Gene Targets for Myocardial Ischemia-Reperfusion Injury
Source: Evid Based Complement Alternat Med. 2022 Apr 15;2022:2056630. doi: 10.1155/2022/2056630 (PMC9033367; doi:10.1155/2022/2056630)
Supplement: Supplementary Materials — Supplementary Table 1. The R code used for the RRA analyses. Supplementary Table 2. Summary of natural products in Chinese herbal medicine exerting protection for MIRI. [file 2056630.f1.zip]

Archive with 2 entries (2 files):
- 2056630.f1/Supplementary Table 1 (1).doc
- 2056630.f1/Supplementary Table 2.doc
